# Supplementary material for: Development and validation of a person-centered antenatal care scale for low- and middle-income countries
Source: Research Square preprint supplement (doi:10.21203/rs.3.rs-5597466/v1), 2025-05-07
Supplement: Supplementary file 1 [file 8ed0d2cd68841e06d9a7a56f.docx]

| **Appendix 1: All PCANC questions with their original distributions before recoding, Ghana only sample, N=594** | | |
| --- | --- | --- |
| Question/response options | No. | % |
| How did you feel about the amount of time you had to wait to be seen by a health worker during antenatal visits (i.e., the time from when you arrived at the health facility to when you saw the midwife or doctor)? | | |
| It was just right | 316 | 52.8 |
| It was somewhat long | 197 | 32.9 |
| It was very long | 59 | 9.9 |
| It was extremely long | 26 | 4.3 |
| Total | 598 | 100 |
|  |  |  |
| How did you feel about the amount of time it took you to retrieve your folder? | | |
| It was just right | 283 | 47.4 |
| It was somewhat long | 102 | 17.1 |
| It was very long | 18 | 3 |
| It was extremely long | 3 | 0.5 |
| Not applicable | 191 | 32 |
| Total | 597 | 100 |
|  |  |  |
| How did you feel about the amount of time it took you to get your labs done at the facility? | | |
| It was just right | 254 | 42.5 |
| It was somewhat long | 128 | 21.4 |
| It was very long | 76 | 12.7 |
| It was extremely long | 37 | 6.2 |
| Not applicable | 102 | 17.1 |
| Total | 597 | 100 |
|  |  |  |
| How did you feel about the amount of time it took you to get your drugs from the dispensary or pharmacy? | | |
| It was just right | 403 | 67.4 |
| It was somewhat long | 73 | 12.2 |
| It was very long | 18 | 3 |
| It was extremely long | 5 | 0.8 |
| Not applicable | 97 | 16.2 |
| Refused to answer | 2 | 0.3 |
| Total | 598 | 100 |
|  |  |  |
| How did you feel about the amount of time the doctor or midwife spent with you? | | |
| It was just right | 517 | 86.5 |
| It was too long | 24 | 4 |
| It was somewhat short | 51 | 8.5 |
| It was very short | 6 | 1 |
| Total | 598 | 100 |
|  |  |  |
| Did the health workers introduce themselves to you when they first saw you? (If you were seen by only one health worker and they introduced themselves, you can select yes, all of them) | | |
| No, none of them | 263 | 44.1 |
| Yes, a few of them | 97 | 16.2 |
| Yes, most of them | 61 | 10.2 |
| Yes, all of them | 175 | 29.3 |
| Refused to answer | 1 | 0.2 |
| Total | 597 | 100 |
|  |  |  |
| Did they greet you well when you arrived? |  |  |
| No, none of them | 81 | 13.6 |
| Yes, a few of them | 128 | 21.4 |
| Yes, most of them | 82 | 13.7 |
| Yes, all of them | 306 | 51.3 |
| Total | 597 | 100 |
|  |  |  |
| Did they call you by your name (or appropriately)? | |  |
| No, never | 93 | 15.6 |
| Yes, a few times | 87 | 14.6 |
| Yes, most of the time | 96 | 16.1 |
| Yes, all the time | 320 | 53.7 |
| Total | 596 | 100 |
|  |  |  |
| Did they treat you with respect? |  |  |
| No, never | 2 | 0.3 |
| Yes, a few times | 27 | 4.5 |
| Yes, most of the time | 78 | 13.1 |
| Yes, all the time | 489 | 81.9 |
| Refused to answer | 1 | 0.2 |
| Total | 597 | 100 |
|  |  |  |
| Were they nice to you? |  |  |
| No, none of them | 1 | 0.2 |
| Yes, a few of them | 34 | 5.7 |
| Yes, most of them | 105 | 17.6 |
| Yes, all of them | 456 | 76.4 |
| Refused to answer | 1 | 0.2 |
| Total | 597 | 100 |
|  |  |  |
| Did you feel your knowledge was valued? *If need to clarify:* Did they appreciate or accept your ideas or knowledge about your health? | | |
| No, never | 5 | 0.8 |
| Yes, a few times | 30 | 5 |
| Yes, most of the time | 117 | 19.6 |
| Yes, all the time | 443 | 74.2 |
| Don’t know | 2 | 0.3 |
| Total | 597 | 100 |
|  |  |  |
| Did you feel heard by the health workers? |  |  |
| No, never | 6 | 1 |
| Yes, a few times | 30 | 5 |
| Yes, most of the time | 114 | 19.1 |
| Yes, all the time | 447 | 74.9 |
| Total | 597 | 100 |
|  |  |  |
| During physical exams (like abdominal and pelvic exams) were you covered up with a cloth or blanket or screened with a curtain so that you did not feel exposed? | | |
| No, never | 33 | 5.5 |
| Yes, a few times | 10 | 1.7 |
| Yes, most of the time | 34 | 5.7 |
| Yes, all the time | 515 | 86.3 |
| Not applicable | 5 | 0.8 |
| Total | 597 | 100 |
|  |  |  |
| Did you feel your health information was kept confidential by the health workers? | | |
| No, never | 52 | 8.7 |
| Yes, a few times | 22 | 3.7 |
| Yes, most of the time | 116 | 19.4 |
| Yes, all the time | 402 | 67.3 |
| Refused to answer | 5 | 0.8 |
| Total | 597 | 100 |
|  |  |  |
| Did you feel you could discuss your problems with the health workers? | | |
| No, never | 62 | 10.4 |
| Yes, a few times | 29 | 4.9 |
| Yes, most of the time | 67 | 11.2 |
| Yes, all the time | 438 | 73.4 |
| Refused to answer | 1 | 0.2 |
| Total | 597 | 100 |
|  |  |  |
| Did the health workers involve you in decisions about your care? | | |
| No, never | 55 | 9.2 |
| Yes, a few times | 24 | 4 |
| Yes, most of the time | 100 | 16.8 |
| Yes, all the time | 417 | 69.8 |
| Refused to answer | 1 | 0.2 |
| Total | 597 | 100 |
|  |  |  |
| Did the health workers ask your permission before examining or doing procedures on you? | | |
| No, never | 5 | 0.8 |
| Yes, a few times | 12 | 2 |
| Yes, most of the time | 58 | 9.7 |
| Yes, all the time | 521 | 87.3 |
| Refused to answer | 1 | 0.2 |
| Total | 597 | 100 |
|  |  |  |
| Did they explain to you why they were doing examinations or procedures on you? | | |
| No, never | 35 | 5.9 |
| Yes, a few times | 15 | 2.5 |
| Yes, most of the time | 74 | 12.4 |
| Yes, all the time | 472 | 79.2 |
| Total | 596 | 100 |
|  |  |  |
| Did you feel you understood the purpose of any tests or procedures you were asked to do?  (*Clarify*: like urine or blood tests, ultrasound, etc., that you were asked to do including those you were asked to do outside the facility) | | |
| No, never | 21 | 3.5 |
| Yes, a few times | 21 | 3.5 |
| Yes, most of the time | 65 | 10.9 |
| Yes, all the time | 486 | 81.4 |
| Not applicable | 2 | 0.3 |
| Refused to answer | 2 | 0.3 |
| Total | 597 | 100 |
|  |  |  |
| Did they explain to you why they were giving or prescribing you any medicine? | | |
| No, never | 29 | 4.9 |
| Yes, a few times | 24 | 4 |
| Yes, most of the time | 65 | 10.9 |
| Yes, all the time | 461 | 77.2 |
| Not applicable/I was not given any medicine | 17 | 2.8 |
| Refused to answer | 1 | 0.2 |
| Total | 597 | 100 |
|  |  |  |
| Did you feel you understood the purpose of any medicines you were given or prescribed to go and buy? | | |
| No, never | 26 | 4.4 |
| Yes, a few times | 21 | 3.5 |
| Yes, most of the time | 60 | 10.1 |
| Yes, all the time | 484 | 81.1 |
| Not applicable | 6 | 1 |
| Total | 597 | 100 |
|  |  |  |
| Did you feel you could ask the health workers any questions you had? | | |
| No, never | 10 | 1.7 |
| Yes, a few times | 22 | 3.7 |
| Yes, most of the time | 63 | 10.6 |
| Yes, all the time | 502 | 84.1 |
| Total | 597 | 100 |
|  |  |  |
| Did you hold back from asking questions for any reason? | |  |
| No, never | 510 | 85.3 |
| Yes, a few times | 41 | 6.9 |
| Yes, most of the time | 9 | 1.5 |
| Yes, all the time | 5 | 0.8 |
| Not applicable/I did not have any questions | 33 | 5.5 |
| Total | 598 | 100 |
|  |  |  |
| Did the health workers at the facility ask you if you had any questions? | | |
| No, never | 58 | 9.7 |
| Yes, a few times | 42 | 7 |
| Yes, most of the time | 104 | 17.4 |
| Yes, all the time | 393 | 65.8 |
| Total | 597 | 100 |
|  |  |  |
| Did they encourage you to ask questions? |  |  |
| No, never | 61 | 10.2 |
| Yes, a few times | 51 | 8.6 |
| Yes, most of the time | 115 | 19.3 |
| Yes, all the time | 369 | 61.9 |
| Total | 596 | 100 |
|  |  |  |
| Do you feel your questions were answered when you asked them? | | |
| Yes, a few times | 24 | 4 |
| Yes, most of the time | 75 | 12.6 |
| Yes, all the time | 409 | 68.5 |
| Not applicable/I did not ask any questions | 89 | 14.9 |
| Total | 597 | 100 |
|  |  |  |
| Did they check that you understood information that was given to you? | | |
| No, never | 51 | 8.5 |
| Yes, a few times | 44 | 7.4 |
| Yes, most of the time | 107 | 17.9 |
| Yes, all the time | 395 | 66.2 |
| Total | 597 | 100 |
|  |  |  |
| Did the health workers speak to you in a language you could understand or using language you could understand? | | |
| No, none of them | 3 | 0.5 |
| Yes, a few of them | 14 | 2.3 |
| Yes, most of them | 74 | 12.4 |
| Yes, all of them | 506 | 84.8 |
| Total | 597 | 100 |
|  |  |  |
| Did they speak to you using words you could understand? | |  |
| No, never | 26 | 4.4 |
| Yes, a few times | 26 | 4.4 |
| Yes, most of the time | 90 | 15.1 |
| Yes, all the time | 454 | 76.2 |
| Total | 596 | 100 |
|  |  |  |
| Did you feel the health workers cared about you? | |  |
| Yes, a few times | 17 | 2.9 |
| Yes, most of the time | 98 | 16.4 |
| Yes, all the time | 481 | 80.7 |
| Total | 596 | 100 |
|  |  |  |
| Did you feel they took the best care of you? |  |  |
| Yes, a few times | 22 | 3.7 |
| Yes, most of the time | 99 | 16.6 |
| Yes, all the time | 475 | 79.6 |
| Refused to answer | 1 | 0.2 |
| Total | 597 | 100 |
|  |  |  |
| Did you feel forced into a decision by health workers? | |  |
| No, never | 533 | 89.1 |
| Yes, a few times | 16 | 2.7 |
| Yes, most of the time | 11 | 1.8 |
| Yes, all the time | 37 | 6.2 |
| Refused to answer | 1 | 0.2 |
| Total | 598 | 100 |
|  |  |  |
| Did a health worker discuss your birth plan with you (e.g., where you wanted to give birth or what you wanted during the birth?) | | |
| No, never | 162 | 27.1 |
| Yes, once | 77 | 12.9 |
| Yes, a few times | 135 | 22.6 |
| Yes, many times | 222 | 37.2 |
| Refused to answer | 1 | 0.2 |
| Total | 597 | 100 |
|  |  |  |
| Did they ask you about your physical health? [Local translation: Did they ask you how you were feeling in your body?] | | |
| No, never | 27 | 4.5 |
| Yes, a few times | 24 | 4 |
| Yes, most of the time | 81 | 13.6 |
| Yes, all the time | 465 | 77.9 |
| Total | 597 | 100 |
|  |  |  |
| Did they give you the support to deal with your mental and emotional health?  [Local translation: Did they give you the support to deal with how you were feeling in your mind or heart if you needed it?] | | |
| No, never | 185 | 31 |
| Yes, a few times | 66 | 11.1 |
| Yes, most of the time | 77 | 12.9 |
| Yes, all the time | 269 | 45.1 |
| Total | 597 | 100 |
|  |  |  |
| Did they ask you about your mood?  [Local translation: Did they ask you how you were feeling in your heart?] | | |
| No, never | 203 | 34 |
| Yes, a few times | 80 | 13.4 |
| Yes, most of the time | 86 | 14.4 |
| Yes, all the time | 227 | 38 |
| Refused to answer | 1 | 0.2 |
| Total | 597 | 100 |
|  |  |  |
| Did they give you the support to deal with your mental and emotional health?  [Local translation: Did they give you the support to deal with how you were feeling in your mind or heart if you needed it?] | | |
| No, never | 49 | 8.2 |
| Yes, a few times | 58 | 9.7 |
| Yes, most of the time | 110 | 18.4 |
| Yes, all the time | 221 | 37 |
| Not applicable/I did not need emotional support | 159 | 26.6 |
| Total | 597 | 100 |
|  |  |  |
| Did the health workers respect your family or companions who were with you? | | |
| No, never | 8 | 1.3 |
| Yes, a few times | 16 | 2.7 |
| Yes, most of the time | 51 | 8.5 |
| Yes, all the time | 240 | 40.2 |
| Not applicable/I did not have family or companions present | 282 | 47.2 |
| Total | 597 | 100 |
|  |  |  |
| When you needed support from the providers with regards to your health, did they pay attention? | | |
| No, never | 13 | 2.2 |
| Yes, a few times | 18 | 3 |
| Yes, most of the time | 92 | 15.4 |
| Yes, all the time | 365 | 61.1 |
| Not applicable/I did not need help | 108 | 18.1 |
| Refused to answer | 1 | 0.2 |
| Total | 597 | 100 |
|  |  |  |
| Did you feel the health workers avoided, ignored, or neglected you? | | |
| No, never | 562 | 94 |
| Yes, once | 6 | 1 |
| Yes, a few times | 12 | 2 |
| Yes, many times | 18 | 3 |
| Total | 598 | 100 |
|  |  |  |
| Did you feel they talked to you badly (For example, shouted at you, scolded, insulted, or threatened, you)? | | |
| No, never | 566 | 94.6 |
| Yes, once | 13 | 2.2 |
| Yes, a few times | 13 | 2.2 |
| Yes, many times | 5 | 0.8 |
| Refused to answer | 1 | 0.2 |
| Total | 598 | 100 |
|  |  |  |
| Did you feel they handled you badly (For example pushed, beat, slapped, pinched or physically restrained you)? | | |
| No, never | 594 | 99.3 |
| Yes, once | 1 | 0.2 |
| Yes, a few times | 2 | 0.3 |
| Yes, many times | 1 | 0.2 |
| Total | 598 | 100 |
|  |  |  |
| Did you feel you could trust the health workers with regards to your care? | | |
| No, never | 16 | 2.7 |
| Yes, a few times | 44 | 7.4 |
| Yes, most of the time | 131 | 21.9 |
| Yes, all the time | 406 | 68 |
| Total | 597 | 100 |
|  |  |  |
| Did you feel the health workers were competent? | |  |
| No, none of them | 1 | 0.2 |
| Yes, a few of them | 51 | 8.5 |
| Yes, most of them | 152 | 25.5 |
| Yes, all of them | 390 | 65.3 |
| Don’t know | 3 | 0.5 |
| Total | 597 | 100 |
|  |  |  |
| Did you feel discriminated against by the health workers in any way? I.e., did you feel you were treated differently based on something about you? | | |
| No, never | 571 | 95.5 |
| Yes, a few times | 18 | 3 |
| Yes, most of the time | 7 | 1.2 |
| Yes, all the time | 2 | 0.3 |
| Total | 598 | 100 |
|  |  |  |
| Did you feel the health facility environment, including the washrooms were clean? | | |
| No, never | 43 | 7.2 |
| Yes, a few times | 49 | 8.2 |
| Yes, most of the time | 136 | 22.8 |
| Yes, all the time | 336 | 56.3 |
| No washroom available | 32 | 5.4 |
| Refused to answer | 1 | 0.2 |
| Total | 597 | 100 |
|  |  |  |
| In general, did you feel physically safe in the place you received antenatal care? | | |
| No, never | 10 | 1.7 |
| Yes, a few times | 31 | 5.2 |
| Yes, most of the time | 135 | 22.6 |
| Yes, all the time | 420 | 70.4 |
| Refused to answer | 1 | 0.2 |
| Total | 597 | 100 |
|  |  |  |
| Do you think there was enough health staff in the facility to care for you? | | |
| No, never | 27 | 4.5 |
| Yes, a few times | 80 | 13.4 |
| Yes, most of the time | 159 | 26.6 |
| Yes, all the time | 331 | 55.4 |
| Total | 597 | 100 |
|  |  |  |
| Were you able to go to your preferred place/clinic for antenatal care? | | |
| No, never | 26 | 4.4 |
| Yes, a few times | 9 | 1.5 |
| Yes, most of the time | 48 | 8 |
| Yes, all the time | 421 | 70.5 |
| Not applicable/I did not have a preferred place/clinic | 93 | 15.6 |
| Total | 597 | 100 |
|  |  |  |
| Were you able to see your preferred provider for antenatal care? | | |
| No, never | 18 | 3 |
| Yes, a few times | 35 | 5.9 |
| Yes, most of the time | 93 | 15.6 |
| Yes, all the time | 294 | 49.2 |
| Not applicable/I did not have a preferred provider | 157 | 26.3 |
| Total | 597 | 100 |
|  |  |  |
| During your antenatal care, did any health worker at the facility ask you or your family for an unofficial payment? | | |
| No, never | 575 | 96.2 |
| Yes, a few times | 17 | 2.8 |
| Yes, most of the time | 2 | 0.3 |
| Yes, all the time | 3 | 0.5 |
| Refused to answer | 1 | 0.2 |
| Total | 598 | 100 |
|  |  |  |
|  |  |  |
|  |  |  |
| **Global ratings for criterion validity** |  |  |
| In general, how satisfied were you with how you were treated by the healthcare workers during your antenatal care? | | |
| Dissatisfied | 5 | 0.8 |
| Neither satisfied nor dissatisfied | 19 | 3.2 |
| Satisfied | 284 | 47.6 |
| Very satisfied | 289 | 48.4 |
| Total | 597 | 100 |
|  |  |  |
| In general, how would you rate the quality of care you received during delivery? | | |
| Very Poor | 2 | 0.3 |
| Poor | 9 | 1.5 |
| Fair | 20 | 3.4 |
| Good | 183 | 30.7 |
| Very Good | 237 | 39.7 |
| Excellent | 144 | 24.1 |
| Refused to answer | 2 | 0.3 |
| Total | 597 | 100 |
|  |  |  |
| Will you want to give birth in the place you received antenatal care?  *For postpartum respondents*: If you were to have another baby, will you want to give birth in the place you received antenatal care? | | |
| No, never | 63 | 10.6 |
| Yes, somewhat | 56 | 9.4 |
| Yes, definitely | 477 | 79.9 |
| Refused to answer | 1 | 0.2 |
| Total | 597 | 100 |

| **Appendix 2: Factor analysis of 50 items, Ghana only sample, N=594** | | | | | | | | |
| --- | --- | --- | --- | --- | --- | --- | --- | --- |
|  | *3 factor structure* | | | | |  | *Single factor structure* | |
| Label | Factor1 | Factor2 | Factor3 | Uniqueness | |  | Factor1 | Uniqueness | |
| Wait time for provider | 0.11 |  |  | 0.99 | |  |  | 0.99 | |
| Wait time for labs or drugs |  |  |  | 0.98 | |  |  | 0.99 | |
| Time with provider | 0.29 |  |  | 0.92 | |  | 0.19 | 0.96 | |
| Introductions by provider | 0.32 |  |  | 0.79 | |  | 0.45 | 0.79 | |
| Greeted | 0.62 |  |  | 0.64 | |  | 0.53 | 0.72 | |
| Called preferred name | 0.39 |  |  | 0.87 | |  | 0.31 | 0.90 | |
| Treat you with respect | 0.66 |  |  | 0.52 | |  | 0.65 | 0.58 | |
| Friendly care | 0.67 |  |  | 0.51 | |  | 0.65 | 0.57 | |
| Knowledge valued | 0.56 |  |  | 0.56 | |  | 0.64 | 0.59 | |
| Heard and listened to | 0.60 |  |  | 0.63 | |  | 0.57 | 0.68 | |
| Privacy/not exposed | 0.22 |  |  | 0.93 | |  | 0.22 | 0.95 | |
| Info confidentiality | 0.36 |  |  | 0.77 | |  | 0.40 | 0.84 | |
| Auditory privacy | 0.58 |  |  | 0.69 | |  | 0.48 | 0.77 | |
| Involved in decisions | 0.35 |  |  | 0.75 | |  | 0.48 | 0.77 | |
| Consent | 0.50 |  |  | 0.61 | |  | 0.57 | 0.68 | |
| Explain exams/procedures | 0.31 |  | 0.36 | 0.65 | |  | 0.56 | 0.69 | |
| Understood tests | 0.32 |  | 0.52 | 0.52 | |  | 0.60 | 0.64 | |
| Explain medications |  |  | 0.81 | 0.35 | |  | 0.56 | 0.69 | |
| Understood medicines |  |  | 0.79 | 0.38 | |  | 0.54 | 0.71 | |
| Told examination results |  | 0.37 |  | 0.87 | |  | 0.19 | 0.96 | |
| Told test results |  | 0.36 |  | 0.87 | |  | 0.16 | 0.98 | |
| Could ask any questions |  |  | 0.27 | 0.76 | |  | 0.47 | 0.78 | |
| Hold back questions |  | 0.32 |  | 0.91 | |  | 0.15 | 0.98 | |
| Asked if questions |  | 0.32 | 0.39 | 0.59 | |  | 0.56 | 0.69 | |
| Encouraged questions |  | 0.40 | 0.43 | 0.50 | |  | 0.59 | 0.65 | |
| Questions were answered |  | 0.38 |  | 0.64 | |  | 0.57 | 0.68 | |
| Check understood information | 0.32 | 0.33 |  | 0.61 | |  | 0.61 | 0.63 | |
| language they understood | 0.49 |  |  | 0.82 | |  | 0.31 | 0.90 | |
| Language level they understood | 0.29 |  |  | 0.87 | |  | 0.35 | 0.88 | |
| Showed they cared | 0.50 |  |  | 0.63 | |  | 0.60 | 0.64 | |
| Received best care | 0.56 |  |  | 0.57 | |  | 0.64 | 0.59 | |
| Pressured |  | 0.27 |  | 0.91 | |  |  | 0.99 | |
| Asked about birth plan |  | 0.28 |  | 0.88 | |  | 0.25 | 0.94 | |
| Physical wellbeing assessed |  | 0.26 |  | 0.76 | |  | 0.47 | 0.78 | |
| Mental/emotions wellbeing assessed |  | 0.70 |  | 0.57 | |  | 0.38 | 0.85 | |
| Resources for emotional/mental wellbeing | | 0.66 |  | 0.59 | |  | 0.41 | 0.83 | |
| Family respected |  | 0.27 |  | 0.88 | |  | 0.29 | 0.92 | |
| Attention when needed help |  | 0.37 |  | 0.77 | |  | 0.43 | 0.82 | |
| Neglected |  |  | 0.10 | 0.97 | |  | 0.17 | 0.97 | |
| Verbal abuse | 0.18 |  |  | 0.90 | |  | 0.32 | 0.90 | |
| physical abuse |  |  |  | 1.00 | |  |  | 1.00 | |
| trust | 0.53 |  |  | 0.66 | |  | 0.56 | 0.69 | |
| Competence | 0.67 |  |  | 0.53 | |  | 0.63 | 0.60 | |
| Discrimination | 0.14 |  |  | 0.95 | |  | 0.21 | 0.95 | |
| Cleanliness | 0.28 |  |  | 0.93 | |  | 0.18 | 0.97 | |
| Safe | 0.46 |  |  | 0.81 | |  | 0.37 | 0.87 | |
| Enough staff |  | 0.21 |  | 0.90 | |  | 0.23 | 0.95 | |
| Preferred clinic |  | 0.22 |  | 0.89 | |  | 0.27 | 0.93 | |
| Preferred provider |  | 0.44 |  | 0.71 | |  | 0.43 | 0.82 | |
| Bribe |  | 0.10 |  | 0.99 | |  |  | 1.00 | |
| Notes: Blanks imply less than 0.1 | | | | |

| **Appendix 3: PCANC questions with their original distributions before recoding, CPIPE Baseline Sample for Ghana and Kenya, N=1,992** | | | | | | | | |
| --- | --- | --- | --- | --- | --- | --- | --- | --- |
|  | **Kenya** |  |  | **Ghana** |  |  | **Total** |  |
|  | ***No.*** | ***%*** |  | ***No.*** | ***%*** |  | ***No.*** | ***%*** |
| How did you feel about the amount of time you had to wait to be seen by a health worker during antenatal visits (i.e., the time from when you arrived at the health facility to when you saw the midwife or doctor)? | | | | | |  |  |  |
| It was just right | 618 | 62.1 |  | 578 | 58 |  | 1,196.00 | 60 |
| It was somewhat long | 244 | 24.5 |  | 294 | 29.5 |  | 538 | 27 |
| It was very long | 115 | 11.6 |  | 116 | 11.6 |  | 231 | 11.6 |
| It was extremely long | 18 | 1.8 |  | 9 | 0.9 |  | 27 | 1.4 |
| Total | 995 | 100 |  | 997 | 100 |  | 1,992.00 | 100 |
|  |  |  |  |  |  |  |  |  |
| How did you feel about the amount of time it took you to get your labs done at the facility? | | | | | |  |  |  |
| It was just right | 573 | 57.6 |  | 477 | 47.8 |  | 1,050.00 | 52.7 |
| It was somewhat long | 234 | 23.5 |  | 224 | 22.5 |  | 458 | 23 |
| It was very long | 149 | 15 |  | 177 | 17.8 |  | 326 | 16.4 |
| It was extremely long | 27 | 2.7 |  | 111 | 11.1 |  | 138 | 6.9 |
| Not applicable | 12 | 1.2 |  | 8 | 0.8 |  | 20 | 1 |
| Total | 995 | 100 |  | 997 | 100 |  | 1,992.00 | 100 |
|  |  |  |  |  |  |  |  |  |
| How did you feel about the amount of time the doctor or midwife spent with you? | | | | | |  |  |  |
| It was just right | 881 | 88.5 |  | 861 | 86.4 |  | 1,742.00 | 87.4 |
| It was too long | 58 | 5.8 |  | 65 | 6.5 |  | 123 | 6.2 |
| It was somewhat short | 47 | 4.7 |  | 59 | 5.9 |  | 106 | 5.3 |
| It was very short | 9 | 0.9 |  | 12 | 1.2 |  | 21 | 1.1 |
| Total | 995 | 100 |  | 997 | 100 |  | 1,992.00 | 100 |
|  |  |  |  |  |  |  |  |  |
| Did the health workers introduce themselves to you when they first saw you? (If you were seen by only one health worker and they introduced themselves, you can select yes, all of them) | | | | | |  |  |  |
| No, none of them | 687 | 69.1 |  | 486 | 48.7 |  | 1,173.00 | 58.9 |
| Yes, a few of them | 158 | 15.9 |  | 196 | 19.7 |  | 354 | 17.8 |
| Yes, most of them | 58 | 5.8 |  | 194 | 19.5 |  | 252 | 12.7 |
| Yes, all of them | 88 | 8.9 |  | 121 | 12.1 |  | 209 | 10.5 |
| Refused to answer | 3 | 0.3 |  | 0 | 0 |  | 3 | 0.2 |
| Total | 994 | 100 |  | 997 | 100 |  | 1,991.00 | 100 |
|  |  |  |  |  |  |  |  |  |
| Did they greet you well when you arrived or responded well if you greeted first? | | | | |  |  |  |  |
| No, none of them | 64 | 6.4 |  | 51 | 5.1 |  | 115 | 5.8 |
| Yes, a few of them | 235 | 23.6 |  | 124 | 12.4 |  | 359 | 18 |
| Yes, most of them | 229 | 23 |  | 281 | 28.2 |  | 510 | 25.6 |
| Yes, all of them | 466 | 46.8 |  | 540 | 54.2 |  | 1,006.00 | 50.5 |
| Refused to answer | 1 | 0.1 |  | 1 | 0.1 |  | 2 | 0.1 |
| Total | 995 | 100 |  | 997 | 100 |  | 1,992.00 | 100 |
|  |  |  |  |  |  |  |  |  |
| Did they call you by your name (or appropriately)? | |  |  |  |  |  |  |  |
| No, never | 87 | 8.7 |  | 133 | 13.3 |  | 220 | 11 |
| Yes, a few times | 110 | 11.1 |  | 111 | 11.1 |  | 221 | 11.1 |
| Yes, most of the time | 185 | 18.6 |  | 280 | 28.1 |  | 465 | 23.3 |
| Yes, all the time | 613 | 61.6 |  | 472 | 47.3 |  | 1,085.00 | 54.5 |
| N/a-don’t know | 0 | 0 |  | 1 | 0.1 |  | 1 | 0.1 |
| Total | 995 | 100 |  | 997 | 100 |  | 1,992.00 | 100 |
|  |  |  |  |  |  |  |  |  |
| Did they treat you with respect? |  |  |  |  |  |  |  |  |
| No, never | 5 | 0.5 |  | 6 | 0.6 |  | 11 | 0.6 |
| Yes, a few times | 85 | 8.5 |  | 59 | 5.9 |  | 144 | 7.2 |
| Yes, most of the time | 201 | 20.2 |  | 262 | 26.3 |  | 463 | 23.2 |
| Yes, all the time | 704 | 70.8 |  | 668 | 67 |  | 1,372.00 | 68.9 |
| N/a-don’t know | 0 | 0 |  | 2 | 0.2 |  | 2 | 0.1 |
| Total | 995 | 100 |  | 997 | 100 |  | 1,992.00 | 100 |
|  |  |  |  |  |  |  |  |  |
| Were they friendly or nice to you? |  |  |  |  |  |  |  |  |
| No, never | 14 | 1.4 |  | 9 | 0.9 |  | 23 | 1.2 |
| Yes, a few times | 91 | 9.1 |  | 72 | 7.2 |  | 163 | 8.2 |
| Yes, most of the time | 204 | 20.5 |  | 253 | 25.4 |  | 457 | 22.9 |
| Yes, all the time | 686 | 68.9 |  | 661 | 66.3 |  | 1,347.00 | 67.6 |
| N/a-don’t know | 0 | 0 |  | 2 | 0.2 |  | 2 | 0.1 |
| Total | 995 | 100 |  | 997 | 100 |  | 1,992.00 | 100 |
|  |  |  |  |  |  |  |  |  |
| Did the health workers ask your permission before examining or doing procedures on you? | | | | | |  |  |  |
| No, never | 272 | 27.3 |  | 15 | 1.5 |  | 287 | 14.4 |
| Yes, a few times | 182 | 18.3 |  | 48 | 4.8 |  | 230 | 11.5 |
| Yes, most of the time | 159 | 16 |  | 240 | 24.1 |  | 399 | 20 |
| Yes, all the time | 379 | 38.1 |  | 693 | 69.5 |  | 1,072.00 | 53.8 |
| N/a-don’t know | 3 | 0.3 |  | 1 | 0.1 |  | 4 | 0.2 |
| Total | 995 | 100 |  | 997 | 100 |  | 1,992.00 | 100 |
|  |  |  |  |  |  |  |  |  |
| D During physical exams (like abdominal and pelvic exams) were you covered up with a cloth or blanket or screened with a curtain so that you did not feel exposed? | | | | | |  |  |  |
| No, never | 152 | 15.3 |  | 55 | 5.5 |  | 207 | 10.4 |
| Yes, a few times | 89 | 8.9 |  | 31 | 3.1 |  | 120 | 6 |
| Yes, most of the time | 162 | 16.3 |  | 150 | 15.1 |  | 312 | 15.7 |
| Yes, all the time | 587 | 59 |  | 758 | 76.1 |  | 1,345.00 | 67.6 |
| N/a-don’t know | 5 | 0.5 |  | 2 | 0.2 |  | 7 | 0.4 |
| Total | 995 | 100 |  | 996 | 100 |  | 1,991.00 | 100 |
|  |  |  |  |  |  |  |  |  |
| Did you feel your knowledge was valued? If need to clarify: Did they appreciate or accept your ideas or knowledge about your health and your baby/ies's health? | | | | | |  |  |  |
| No, never | 46 | 4.6 |  | 33 | 3.3 |  | 79 | 4 |
| Yes, a few times | 164 | 16.5 |  | 174 | 17.5 |  | 338 | 17 |
| Yes, most of the time | 234 | 23.5 |  | 306 | 30.7 |  | 540 | 27.1 |
| Yes, all the time | 377 | 37.9 |  | 467 | 46.8 |  | 844 | 42.4 |
| N/a-don’t know | 174 | 17.5 |  | 17 | 1.7 |  | 191 | 9.6 |
| Total | 995 | 100 |  | 997 | 100 |  | 1,992.00 | 100 |
|  |  |  |  |  |  |  |  |  |
| Did you feel heard by the health workers? |  |  |  |  |  |  |  |  |
| No, never | 37 | 3.7 |  | 80 | 8 |  | 117 | 5.9 |
| Yes, a few times | 133 | 13.4 |  | 140 | 14 |  | 273 | 13.7 |
| Yes, most of the time | 224 | 22.5 |  | 267 | 26.8 |  | 491 | 24.6 |
| Yes, all the time | 461 | 46.3 |  | 502 | 50.4 |  | 963 | 48.3 |
| N/a-don’t know | 140 | 14.1 |  | 8 | 0.8 |  | 148 | 7.4 |
| Total | 995 | 100 |  | 997 | 100 |  | 1,992.00 | 100 |
|  |  |  |  |  |  |  |  |  |
| Did you feel your health information was kept confidential by the health workers? | | | | | |  |  |  |
| No, never | 23 | 2.3 |  | 33 | 3.3 |  | 56 | 2.8 |
| Yes, a few times | 47 | 4.7 |  | 78 | 7.8 |  | 125 | 6.3 |
| Yes, most of the time | 214 | 21.5 |  | 227 | 22.8 |  | 441 | 22.1 |
| Yes, all the time | 644 | 64.7 |  | 614 | 61.6 |  | 1,258.00 | 63.2 |
| N/a-don’t know | 67 | 6.7 |  | 45 | 4.5 |  | 112 | 5.6 |
| Total | 995 | 100 |  | 997 | 100 |  | 1,992.00 | 100 |
|  |  |  |  |  |  |  |  |  |
| Did you feel you could discuss your problems with the health workers, without others not involved in your care overhearing your conversations? | | | | | |  |  |  |
| No, never | 179 | 18 |  | 119 | 11.9 |  | 298 | 15 |
| Yes, a few times | 102 | 10.3 |  | 104 | 10.4 |  | 206 | 10.3 |
| Yes, most of the time | 183 | 18.4 |  | 259 | 26 |  | 442 | 22.2 |
| Yes, all the time | 515 | 51.8 |  | 509 | 51.1 |  | 1,024.00 | 51.4 |
| N/a-don’t know | 16 | 1.6 |  | 5 | 0.5 |  | 21 | 1.1 |
| Total | 995 | 100 |  | 996 | 100 |  | 1,991.00 | 100 |
|  |  |  |  |  |  |  |  |  |
| Did they explain to you why they were doing examinations or tests on you? | | | | |  |  |  |  |
| No, never | 261 | 26.2 |  | 98 | 9.8 |  | 359 | 18 |
| Yes, a few times | 180 | 18.1 |  | 103 | 10.3 |  | 283 | 14.2 |
| Yes, most of the time | 200 | 20.1 |  | 250 | 25.1 |  | 450 | 22.6 |
| Yes, all the time | 350 | 35.2 |  | 545 | 54.7 |  | 895 | 44.9 |
| N/a-don’t know | 4 | 0.4 |  | 1 | 0.1 |  | 5 | 0.3 |
| Total | 995 | 100 |  | 997 | 100 |  | 1,992.00 | 100 |
|  |  |  |  |  |  |  |  |  |
| Did the health workers involved you in decisions about your care? | | | |  |  |  |  |  |
| No, never | 189 | 19 |  | 66 | 6.6 |  | 255 | 12.8 |
| Yes, a few times | 183 | 18.4 |  | 145 | 14.6 |  | 328 | 16.5 |
| Yes, most of the time | 275 | 27.6 |  | 269 | 27 |  | 544 | 27.3 |
| Yes, all the time | 330 | 33.2 |  | 514 | 51.6 |  | 844 | 42.4 |
| N/a-don’t know | 18 | 1.8 |  | 2 | 0.2 |  | 20 | 1 |
| Total | 995 | 100 |  | 996 | 100 |  | 1,991.00 | 100 |
|  |  |  |  |  |  |  |  |  |
| Did you feel you understood the purpose of any tests or procedures you were asked to do? (*Clarify*: like urine or blood tests, ultrasound, etc., that you were asked to do including those you were asked to do outside the facility) | | | | | |  |  |  |
| No, never | 232 | 23.3 |  | 88 | 8.8 |  | 320 | 16.1 |
| Yes, a few times | 227 | 22.8 |  | 129 | 12.9 |  | 356 | 17.9 |
| Yes, most of the time | 190 | 19.1 |  | 274 | 27.5 |  | 464 | 23.3 |
| Yes, all the time | 336 | 33.8 |  | 503 | 50.5 |  | 839 | 42.1 |
| N/a-don’t know | 10 | 1 |  | 3 | 0.3 |  | 13 | 0.7 |
| Total | 995 | 100 |  | 997 | 100 |  | 1,992.00 | 100 |
|  |  |  |  |  |  |  |  |  |
| Was your blood pressure taken? If YES, was your blood pressure taken all the time, most of the time, or a few times? | | | | |  |  |  |  |
| No, never | 251 | 25.2 |  | 111 | 11.1 |  | 362 | 18.2 |
| Yes, a few times | 152 | 15.3 |  | 130 | 13 |  | 282 | 14.2 |
| Yes, most of the time | 173 | 17.4 |  | 248 | 24.9 |  | 421 | 21.1 |
| Yes, all the time | 413 | 41.5 |  | 507 | 50.9 |  | 920 | 46.2 |
| N/a-don’t know | 5 | 0.5 |  | 1 | 0.1 |  | 6 | 0.3 |
| Refused to answer | 1 | 0.1 |  | 0 | 0 |  | 1 | 0.1 |
| Total | 995 | 100 |  | 997 | 100 |  | 1,992.00 | 100 |
|  |  |  |  |  |  |  |  |  |
| Did they tell you the results of tests you did like blood or urine tests? | | | |  |  |  |  |  |
| No, never | 288 | 28.9 |  | 108 | 10.8 |  | 396 | 19.9 |
| Yes, a few times | 205 | 20.6 |  | 159 | 15.9 |  | 364 | 18.3 |
| Yes, most of the time | 153 | 15.4 |  | 249 | 25 |  | 402 | 20.2 |
| Yes, all the time | 334 | 33.6 |  | 480 | 48.1 |  | 814 | 40.9 |
| N/a-don’t know | 14 | 1.4 |  | 1 | 0.1 |  | 15 | 0.8 |
| Refused to answer | 1 | 0.1 |  | 0 | 0 |  | 1 | 0.1 |
| Total | 995 | 100 |  | 997 | 100 |  | 1,992.00 | 100 |
|  |  |  |  |  |  |  |  |  |
| Did they explain to you why they were giving or prescribing you any medicine? | | | | |  |  |  |  |
| No, never | 154 | 15.5 |  | 88 | 8.8 |  | 242 | 12.1 |
| Yes, a few times | 195 | 19.6 |  | 118 | 11.8 |  | 313 | 15.7 |
| Yes, most of the time | 197 | 19.8 |  | 245 | 24.6 |  | 442 | 22.2 |
| Yes, all the time | 438 | 44 |  | 544 | 54.6 |  | 982 | 49.3 |
| N/a-don’t know | 11 | 1.1 |  | 2 | 0.2 |  | 13 | 0.7 |
| Total | 995 | 100 |  | 997 | 100 |  | 1,992.00 | 100 |
|  |  |  |  |  |  |  |  |  |
| Did you understand the purpose of any medicines you were given or prescribed? | | | | | |  |  |  |
| No, never | 148 | 14.9 |  | 81 | 8.1 |  | 229 | 11.5 |
| Yes, a few times | 206 | 20.7 |  | 135 | 13.5 |  | 341 | 17.1 |
| Yes, most of the time | 205 | 20.6 |  | 255 | 25.6 |  | 460 | 23.1 |
| Yes, all the time | 424 | 42.6 |  | 522 | 52.4 |  | 946 | 47.5 |
| N/a-don’t know | 11 | 1.1 |  | 4 | 0.4 |  | 15 | 0.8 |
| Refused to answer | 1 | 0.1 |  | 0 | 0 |  | 1 | 0.1 |
| Total | 995 | 100 |  | 997 | 100 |  | 1,992.00 | 100 |
|  |  |  |  |  |  |  |  |  |
| Did you feel you could ask the health workers any questions you had? | | | |  |  |  |  |  |
| No, never | 100 | 10.1 |  | 72 | 7.2 |  | 172 | 8.6 |
| Yes, a few times | 201 | 20.2 |  | 147 | 14.7 |  | 348 | 17.5 |
| Yes, most of the time | 181 | 18.2 |  | 268 | 26.9 |  | 449 | 22.5 |
| Yes, all the time | 494 | 49.6 |  | 508 | 51 |  | 1,002.00 | 50.3 |
| N/a-don’t know | 19 | 1.9 |  | 2 | 0.2 |  | 21 | 1.1 |
| Total | 995 | 100 |  | 997 | 100 |  | 1,992.00 | 100 |
|  |  |  |  |  |  |  |  |  |
| Did you hold back from asking questions for any reason? | | |  |  |  |  |  |  |
| No, never | 714 | 71.8 |  | 694 | 69.6 |  | 1,408.00 | 70.7 |
| Yes, a few times | 150 | 15.1 |  | 104 | 10.4 |  | 254 | 12.8 |
| Yes, most of the time | 61 | 6.1 |  | 104 | 10.4 |  | 165 | 8.3 |
| Yes, all the time | 57 | 5.7 |  | 86 | 8.6 |  | 143 | 7.2 |
| N/a-don’t know | 13 | 1.3 |  | 9 | 0.9 |  | 22 | 1.1 |
| Total | 995 | 100 |  | 997 | 100 |  | 1,992.00 | 100 |
|  |  |  |  |  |  |  |  |  |
| Did they encourage you to ask questions? |  |  |  |  |  |  |  |  |
| No, never | 276 | 27.7 |  | 131 | 13.1 |  | 407 | 20.4 |
| Yes, a few times | 203 | 20.4 |  | 149 | 14.9 |  | 352 | 17.7 |
| Yes, most of the time | 161 | 16.2 |  | 258 | 25.9 |  | 419 | 21 |
| Yes, all the time | 350 | 35.2 |  | 457 | 45.8 |  | 807 | 40.5 |
| N/a-don’t know | 5 | 0.5 |  | 2 | 0.2 |  | 7 | 0.4 |
| Total | 995 | 100 |  | 997 | 100 |  | 1,992.00 | 100 |
|  |  |  |  |  |  |  |  |  |
| Do you feel your questions were answered when you asked them? | | | |  |  |  |  |  |
| No, never | 44 | 4.4 |  | 77 | 7.7 |  | 121 | 6.1 |
| Yes, a few times | 156 | 15.7 |  | 154 | 15.4 |  | 310 | 15.6 |
| Yes, most of the time | 219 | 22 |  | 242 | 24.3 |  | 461 | 23.1 |
| Yes, all the time | 448 | 45 |  | 504 | 50.6 |  | 952 | 47.8 |
| N/a-don’t know | 127 | 12.8 |  | 20 | 2 |  | 147 | 7.4 |
| Refused to answer | 1 | 0.1 |  | 0 | 0 |  | 1 | 0.1 |
| Total | 995 | 100 |  | 997 | 100 |  | 1,992.00 | 100 |
|  |  |  |  |  |  |  |  |  |
| Did they check that you understood information that was given to you? | | | |  |  |  |  |  |
| No, never | 259 | 26 |  | 87 | 8.7 |  | 346 | 17.4 |
| Yes, a few times | 202 | 20.3 |  | 190 | 19.1 |  | 392 | 19.7 |
| Yes, most of the time | 167 | 16.8 |  | 265 | 26.6 |  | 432 | 21.7 |
| Yes, all the time | 315 | 31.7 |  | 446 | 44.7 |  | 761 | 38.2 |
| N/a-don’t know | 52 | 5.2 |  | 9 | 0.9 |  | 61 | 3.1 |
| Total | 995 | 100 |  | 997 | 100 |  | 1,992.00 | 100 |
|  |  |  |  |  |  |  |  |  |
| Did you feel you understood the purpose of any medicines you were given or prescribed for yourself? | | | | | |  |  |  |
| No, none of them | 2 | 0.2 |  | 4 | 0.4 |  | 6 | 0.3 |
| Yes, a few of them | 7 | 0.7 |  | 48 | 4.8 |  | 55 | 2.8 |
| Yes, most of them | 83 | 8.3 |  | 217 | 21.8 |  | 300 | 15.1 |
| Yes, all of them | 903 | 90.8 |  | 726 | 72.9 |  | 1,629.00 | 81.8 |
| Refused to answer | 0 | 0 |  | 1 | 0.1 |  | 1 | 0.1 |
| Total | 995 | 100 |  | 996 | 100 |  | 1,991.00 | 100 |
|  |  |  |  |  |  |  |  |  |
| Did you feel the health workers cared about you? | |  |  |  |  |  |  |  |
| No, never | 9 | 0.9 |  | 7 | 0.7 |  | 16 | 0.8 |
| Yes, a few times | 79 | 7.9 |  | 87 | 8.7 |  | 166 | 8.3 |
| Yes, most of the time | 280 | 28.1 |  | 301 | 30.2 |  | 581 | 29.2 |
| Yes, all the time | 624 | 62.7 |  | 601 | 60.3 |  | 1,225.00 | 61.5 |
| Refused to answer | 3 | 0.3 |  | 0 | 0 |  | 3 | 0.2 |
| Total | 995 | 100 |  | 996 | 100 |  | 1,991.00 | 100 |
|  |  |  |  |  |  |  |  |  |
| Did you feel they took the best care of you? |  |  |  |  |  |  |  |  |
| No, never | 10 | 1 |  | 9 | 0.9 |  | 19 | 1 |
| Yes, a few times | 78 | 7.8 |  | 84 | 8.4 |  | 162 | 8.1 |
| Yes, most of the time | 306 | 30.8 |  | 312 | 31.3 |  | 618 | 31 |
| Yes, all the time | 601 | 60.4 |  | 591 | 59.3 |  | 1,192.00 | 59.8 |
| Refused to answer | 0 | 0 |  | 1 | 0.1 |  | 1 | 0.1 |
| Total | 995 | 100 |  | 997 | 100 |  | 1,992.00 | 100 |
|  |  |  |  |  |  |  |  |  |
| Did you feel forced into a decision by health workers? | |  |  |  |  |  |  |  |
| No, never | 885 | 88.9 |  | 910 | 91.3 |  | 1,795.00 | 90.1 |
| Yes, a few times | 46 | 4.6 |  | 26 | 2.6 |  | 72 | 3.6 |
| Yes, most of the time | 24 | 2.4 |  | 22 | 2.2 |  | 46 | 2.3 |
| Yes, all the time | 40 | 4 |  | 39 | 3.9 |  | 79 | 4 |
| Total | 995 | 100 |  | 997 | 100 |  | 1,992.00 | 100 |
|  |  |  |  |  |  |  |  |  |
| Did a health worker discuss your birth plan with you (e.g., where you wanted to give birth or what you wanted during the birth?) | | | | |  |  |  |  |
| No, never | 325 | 32.7 |  | 355 | 35.6 |  | 680 | 34.1 |
| Yes, once | 257 | 25.8 |  | 103 | 10.3 |  | 360 | 18.1 |
| Yes, a few times | 155 | 15.6 |  | 241 | 24.2 |  | 396 | 19.9 |
| Yes, many times | 258 | 25.9 |  | 296 | 29.7 |  | 554 | 27.8 |
| Refused to answer | 0 | 0 |  | 2 | 0.2 |  | 2 | 0.1 |
| Total | 995 | 100 |  | 997 | 100 |  | 1,992.00 | 100 |
|  |  |  |  |  |  |  |  |  |
| Did they ask you about your physical health?  [Local translation: Did they ask you how you were feeling in your body?] | | | | |  |  |  |  |
| No, never | 137 | 13.8 |  | 36 | 3.6 |  | 173 | 8.7 |
| Yes, a few times | 160 | 16.1 |  | 106 | 10.6 |  | 266 | 13.4 |
| Yes, most of the time | 236 | 23.7 |  | 227 | 22.8 |  | 463 | 23.2 |
| Yes, all the time | 460 | 46.2 |  | 628 | 63 |  | 1,088.00 | 54.6 |
| N/a-don’t know | 2 | 0.2 |  | 0 | 0 |  | 2 | 0.1 |
| Total | 995 | 100 |  | 997 | 100 |  | 1,992.00 | 100 |
|  |  |  |  |  |  |  |  |  |
| Did they ask you about your mental health?  [Local translation: Did they ask you how you were feeling in your mind?] | | | | | |  |  |  |
| No, never | 564 | 56.7 |  | 335 | 33.6 |  | 899 | 45.1 |
| Yes, a few times | 173 | 17.4 |  | 201 | 20.2 |  | 374 | 18.8 |
| Yes, most of the time | 90 | 9 |  | 167 | 16.8 |  | 257 | 12.9 |
| Yes, all the time | 161 | 16.2 |  | 283 | 28.4 |  | 444 | 22.3 |
| N/a-don’t know | 7 | 0.7 |  | 11 | 1.1 |  | 18 | 0.9 |
| Total | 995 | 100 |  | 997 | 100 |  | 1,992.00 | 100 |
|  |  |  |  |  |  |  |  |  |
| Did they give you the support to deal with your mental and emotional health?  [Local translation: Did they give you the support to deal with how you were feeling in your mind or heart if you needed it?] | | | | |  |  |  |  |
| No, never | 496 | 49.8 |  | 340 | 34.1 |  | 836 | 42 |
| Yes, a few times | 128 | 12.9 |  | 146 | 14.6 |  | 274 | 13.8 |
| Yes, most of the time | 64 | 6.4 |  | 156 | 15.6 |  | 220 | 11 |
| Yes, all the time | 107 | 10.8 |  | 249 | 25 |  | 356 | 17.9 |
| N/a-don’t know | 200 | 20.1 |  | 106 | 10.6 |  | 306 | 15.4 |
| Total | 995 | 100 |  | 997 | 100 |  | 1,992.00 | 100 |
|  |  |  |  |  |  |  |  |  |
| Did the health workers respect your family or companions who were with you? | | | | |  |  |  |  |
| No, never | 22 | 2.2 |  | 19 | 1.9 |  | 41 | 2.1 |
| Yes, a few times | 70 | 7 |  | 52 | 5.2 |  | 122 | 6.1 |
| Yes, most of the time | 119 | 12 |  | 240 | 24.1 |  | 359 | 18 |
| Yes, all the time | 312 | 31.4 |  | 524 | 52.6 |  | 836 | 42 |
| N/a-don’t know | 471 | 47.3 |  | 162 | 16.2 |  | 633 | 31.8 |
| Refused to answer | 1 | 0.1 |  | 0 | 0 |  | 1 | 0.1 |
| Total | 995 | 100 |  | 997 | 100 |  | 1,992.00 | 100 |
|  |  |  |  |  |  |  |  |  |
| When you needed support from the providers with regards to your health, did they pay attention? | | | | | |  |  |  |
| No, never | 17 | 1.7 |  | 10 | 1 |  | 27 | 1.4 |
| Yes, a few times | 113 | 11.4 |  | 110 | 11 |  | 223 | 11.2 |
| Yes, most of the time | 256 | 25.7 |  | 293 | 29.4 |  | 549 | 27.6 |
| Yes, all the time | 505 | 50.8 |  | 578 | 58 |  | 1,083.00 | 54.4 |
| N/a-don’t know | 103 | 10.4 |  | 6 | 0.6 |  | 109 | 5.5 |
| Refused to answer | 1 | 0.1 |  | 0 | 0 |  | 1 | 0.1 |
| Total | 995 | 100 |  | 997 | 100 |  | 1,992.00 | 100 |
|  |  |  |  |  |  |  |  |  |
| Did you feel you could trust the health workers with regards to your care? | | | | |  |  |  |  |
| No, never | 18 | 1.8 |  | 18 | 1.8 |  | 36 | 1.8 |
| Yes, a few times | 87 | 8.7 |  | 104 | 10.4 |  | 191 | 9.6 |
| Yes, most of the time | 285 | 28.6 |  | 312 | 31.3 |  | 597 | 30 |
| Yes, all the time | 603 | 60.6 |  | 559 | 56.1 |  | 1,162.00 | 58.3 |
| N/a-don’t know | 2 | 0.2 |  | 4 | 0.4 |  | 6 | 0.3 |
| Total | 995 | 100 |  | 997 | 100 |  | 1,992.00 | 100 |
|  |  |  |  |  |  |  |  |  |
| Did you feel discriminated against by the health workers in any way?  I.e., did you feel you were treated differently based on something about you? | | | | |  |  |  |  |
| No, never | 940 | 94.5 |  | 904 | 90.7 |  | 1,844.00 | 92.6 |
| Yes, a few times | 36 | 3.6 |  | 44 | 4.4 |  | 80 | 4 |
| Yes, most of the time | 8 | 0.8 |  | 24 | 2.4 |  | 32 | 1.6 |
| Yes, all the time | 8 | 0.8 |  | 16 | 1.6 |  | 24 | 1.2 |
| N/a-don’t know | 3 | 0.3 |  | 9 | 0.9 |  | 12 | 0.6 |
| Total | 995 | 100 |  | 997 | 100 |  | 1,992.00 | 100 |
|  |  |  |  |  |  |  |  |  |
| Did you feel the health workers avoided, ignored, or neglected you? | | | |  |  |  |  |  |
| No, never | 945 | 95 |  | 960 | 96.3 |  | 1,905.00 | 95.6 |
| Yes, once | 33 | 3.3 |  | 23 | 2.3 |  | 56 | 2.8 |
| Yes, a few times | 13 | 1.3 |  | 13 | 1.3 |  | 26 | 1.3 |
| Yes, many times | 4 | 0.4 |  | 1 | 0.1 |  | 5 | 0.3 |
| Total | 995 | 100 |  | 997 | 100 |  | 1,992.00 | 100 |
|  |  |  |  |  |  |  |  |  |
| Did you feel they talked to you badly (For example, shouted at you, scolded, insulted, or threatened, you)? | | | | |  |  |  |  |
| No, never | 939 | 94.4 |  | 934 | 93.7 |  | 1,873.00 | 94 |
| Yes, once | 34 | 3.4 |  | 28 | 2.8 |  | 62 | 3.1 |
| Yes, a few times | 20 | 2 |  | 29 | 2.9 |  | 49 | 2.5 |
| Yes, many times | 2 | 0.2 |  | 6 | 0.6 |  | 8 | 0.4 |
| Total | 995 | 100 |  | 997 | 100 |  | 1,992.00 | 100 |
|  |  |  |  |  |  |  |  |  |
| Did you feel the health workers were competent? | |  |  |  |  |  |  |  |
| No, none of them | 13 | 1.3 |  | 6 | 0.6 |  | 19 | 1 |
| Yes, a few of them | 43 | 4.3 |  | 95 | 9.5 |  | 138 | 6.9 |
| Yes, most of them | 232 | 23.3 |  | 349 | 35 |  | 581 | 29.2 |
| Yes, all of them | 696 | 69.9 |  | 541 | 54.3 |  | 1,237.00 | 62.1 |
| Don’t know | 11 | 1.1 |  | 6 | 0.6 |  | 17 | 0.9 |
| Total | 995 | 100 |  | 997 | 100 |  | 1,992.00 | 100 |
|  |  |  |  |  |  |  |  |  |
| Could you use the washrooms in the facility if you needed to? | | | | | |  |  |  |
| No, never | 36 | 3.6 |  | 106 | 10.6 |  | 142 | 7.1 |
| Yes, a few times | 180 | 18.1 |  | 156 | 15.7 |  | 336 | 16.9 |
| Yes, most of the time | 125 | 12.6 |  | 223 | 22.4 |  | 348 | 17.5 |
| Yes, all the time | 625 | 62.8 |  | 485 | 48.7 |  | 1,110.00 | 55.8 |
| N/a-don’t know | 29 | 2.9 |  | 26 | 2.6 |  | 55 | 2.8 |
| Total | 995 | 100 |  | 996 | 100 |  | 1,991.00 | 100 |
|  |  |  |  |  |  |  |  |  |
| Did you feel the health facility environment, including the washrooms were clean? | | | | | |  |  |  |
| No, never | 70 | 7 |  | 61 | 6.1 |  | 131 | 6.6 |
| Yes, a few times | 178 | 17.9 |  | 137 | 13.7 |  | 315 | 15.8 |
| Yes, most of the time | 239 | 24 |  | 339 | 34 |  | 578 | 29 |
| Yes, all the time | 497 | 49.9 |  | 443 | 44.4 |  | 940 | 47.2 |
| N/a-don’t know | 11 | 1.1 |  | 17 | 1.7 |  | 28 | 1.4 |
| Total | 995 | 100 |  | 997 | 100 |  | 1,992.00 | 100 |
|  |  |  |  |  |  |  |  |  |
| In general, did you feel safe in the health facility? | | | | |  |  |  |  |
| No, never | 7 | 0.7 |  | 32 | 3.2 |  | 39 | 2 |
| Yes, a few times | 57 | 5.7 |  | 81 | 8.1 |  | 138 | 6.9 |
| Yes, most of the time | 243 | 24.4 |  | 295 | 29.6 |  | 538 | 27 |
| Yes, all the time | 686 | 68.9 |  | 587 | 58.9 |  | 1,273.00 | 63.9 |
| N/a-don’t know | 1 | 0.1 |  | 2 | 0.2 |  | 3 | 0.2 |
| Refused to answer | 1 | 0.1 |  | 0 | 0 |  | 1 | 0.1 |
| Total | 995 | 100 |  | 997 | 100 |  | 1,992.00 | 100 |
|  |  |  |  |  |  |  |  |  |
| Do you think there was enough health staff in the facility to care for you? | | | | |  |  |  |  |
| No, never | 109 | 11 |  | 51 | 5.1 |  | 160 | 8 |
| Yes, a few times | 106 | 10.7 |  | 109 | 10.9 |  | 215 | 10.8 |
| Yes, most of the time | 239 | 24 |  | 279 | 28 |  | 518 | 26 |
| Yes, all the time | 533 | 53.6 |  | 557 | 55.9 |  | 1,090.00 | 54.7 |
| N/a-don’t know | 8 | 0.8 |  | 1 | 0.1 |  | 9 | 0.5 |
| Total | 995 | 100 |  | 997 | 100 |  | 1,992.00 | 100 |
|  |  |  |  |  |  |  |  |  |
| During your antenatal care, did any health worker at the facility ask you or your family for an unofficial payment? | | | | |  |  |  |  |
| No, never | 875 | 87.9 |  | 792 | 79.4 |  | 1,667.00 | 83.7 |
| Yes, a few times | 89 | 8.9 |  | 92 | 9.2 |  | 181 | 9.1 |
| Yes, most of the time | 12 | 1.2 |  | 39 | 3.9 |  | 51 | 2.6 |
| Yes, all the time | 15 | 1.5 |  | 52 | 5.2 |  | 67 | 3.4 |
| N/a-don’t know | 4 | 0.4 |  | 21 | 2.1 |  | 25 | 1.3 |
| Refused to answer | 0 | 0 |  | 1 | 0.1 |  | 1 | 0.1 |
| Total | 995 | 100 |  | 997 | 100 |  | 1,992.00 | 100 |

| **Appendix 4: Factor analysis of 46 items, CPIPE Baseline Sample for Ghana and Kenya, N=1,992** | | | | | | | |
| --- | --- | --- | --- | --- | --- | --- | --- |
|  | *3 factor structure* | | | |  | *Single factor structure* | |
| Item | Factor1 | Factor2 | Factor3 | Uniqueness |  | Factor1 | Uniqueness |
| Introductions by provider | 0.41 |  |  | 0.82 |  | 0.33 | 0.89 |
| Greeted |  | 0.47 |  | 0.63 |  | 0.58 | 0.66 |
| Called preferred name |  | 0.44 |  | 0.83 |  | 0.34 | 0.88 |
| Treat you with respect |  | 0.74 |  | 0.44 |  | 0.65 | 0.58 |
| Friendly care |  | 0.74 |  | 0.43 |  | 0.65 | 0.57 |
| Consent | 0.53 |  |  | 0.67 |  | 0.53 | 0.72 |
| Privacy not exposed | 0.31 |  |  | 0.74 |  | 0.50 | 0.75 |
| Knowledge valued | 0.30 | 0.50 |  | 0.49 |  | 0.71 | 0.50 |
| Heard and listened to |  | 0.52 |  | 0.56 |  | 0.63 | 0.60 |
| Info confidentiality |  | 0.49 |  | 0.74 |  | 0.45 | 0.80 |
| Auditory privacy | 0.25 | 0.24 |  | 0.80 |  | 0.43 | 0.81 |
| Explain exams/procedures | 0.81 |  |  | 0.41 |  | 0.65 | 0.58 |
| Involved in decisions | 0.55 |  |  | 0.52 |  | 0.67 | 0.55 |
| Understood tests | 0.81 |  |  | 0.39 |  | 0.67 | 0.55 |
| Told examination results | 0.71 |  |  | 0.54 |  | 0.56 | 0.69 |
| Told test results | 0.76 |  |  | 0.50 |  | 0.58 | 0.66 |
| Explain medications | 0.81 |  |  | 0.36 |  | 0.70 | 0.51 |
| Understood medicines | 0.80 |  |  | 0.38 |  | 0.69 | 0.52 |
| Could ask any questions | 0.40 |  |  | 0.57 |  | 0.66 | 0.57 |
| Encouraged questions | 0.64 |  |  | 0.47 |  | 0.69 | 0.53 |
| Questions were answered | 0.42 |  |  | 0.56 |  | 0.66 | 0.56 |
| Check understood information | 0.62 |  |  | 0.47 |  | 0.70 | 0.51 |
| language they understood |  | 0.53 |  | 0.77 |  | 0.28 | 0.92 |
| Showed they cared |  | 0.82 |  | 0.34 |  | 0.70 | 0.50 |
| Received best care |  | 0.78 |  | 0.37 |  | 0.70 | 0.51 |
| Asked about birth plan | 0.42 |  |  | 0.77 |  | 0.40 | 0.84 |
| Physical wellbeing assessed | 0.39 |  |  | 0.76 |  | 0.47 | 0.78 |
| Mental/emotions wellbeing assessed | 0.62 |  |  | 0.60 |  | 0.57 | 0.68 |
| Resources for emotional/mental wellbeing | 0.52 |  |  | 0.70 |  | 0.50 | 0.75 |
| Family respected |  | 0.31 |  | 0.79 |  | 0.46 | 0.79 |
| Attention when needed help |  | 0.54 |  | 0.53 |  | 0.65 | 0.57 |
| Trust |  | 0.74 |  | 0.46 |  | 0.64 | 0.59 |
| Competence |  | 0.62 |  | 0.64 |  | 0.49 | 0.76 |
| Washrooms |  | 0.34 |  | 0.88 |  | 0.28 | 0.92 |
| Cleanliness |  | 0.41 |  | 0.81 |  | 0.40 | 0.84 |
| Safe |  | 0.74 |  | 0.55 |  | 0.52 | 0.73 |
| Enough staff |  | 0.31 |  | 0.86 |  | 0.35 | 0.88 |
| Wait time for provider |  |  | 0.63 | 0.59 |  |  | 0.99 |
| Wait time for labs or drugs |  |  | 0.65 | 0.56 |  |  | 0.99 |
| Time with provider |  |  | 0.25 | 0.93 |  |  | 1.00 |
| Hold back questions |  |  |  | 0.98 |  | 0.10 | 0.99 |
| Pressured |  |  |  | 0.98 |  |  | 0.99 |
| Discrimination |  | 0.24 |  | 0.96 |  | 0.13 | 0.98 |
| Neglected |  | 0.31 |  | 0.89 |  | 0.22 | 0.95 |
| Verbal abuse |  | 0.29 | 0.26 | 0.86 |  | 0.24 | 0.94 |
| Bribe |  |  |  | 0.99 |  |  | 1.00 |
| (blanks represent loading<.1) | | | | | | | |

| **Appendix 5: Exploratory factor analysis if 36 retained items, CPIPE Baseline survey, N=1988** | | | | | | | | | | |
| --- | --- | --- | --- | --- | --- | --- | --- | --- | --- | --- |
|  | **3 factor structure for full scale** | | | |  | **single factor structure for full scale** | |  | **Single factor by sub-scale** | |
| *Subscale/items* | *Factor1* | *Factor2* | *Factor3* | *Uniqueness* |  | *Factor1* | *Uniqueness* |  | *Factor1* | *Uniqueness* |
| **Dignity and respect** |  |  |  |  |  |  |  |  |  |  |
| Greeted |  | 0.43 |  | 0.63 |  | 0.59 | 0.65 |  | 0.59 | 0.66 |
| Treat you with respect |  | 0.77 |  | 0.42 |  | 0.66 | 0.57 |  | 0.82 | 0.33 |
| Friendly care |  | 0.78 |  | 0.41 |  | 0.66 | 0.56 |  | 0.82 | 0.33 |
| Knowledge valued |  | 0.50 |  | 0.48 |  | 0.72 | 0.49 |  | 0.65 | 0.58 |
| Privacy not exposed | 0.31 |  |  | 0.74 |  | 0.50 | 0.75 |  | 0.49 | 0.76 |
| Info confidentiality |  | 0.49 |  | 0.73 |  | 0.46 | 0.79 |  | 0.51 | 0.74 |
| Auditory privacy |  | 0.24 |  | 0.79 |  | 0.44 | 0.81 |  | 0.44 | 0.81 |
| Verbal abuse |  | 0.27 |  | 0.90 |  | 0.23 | 0.95 |  | 0.26 | 0.93 |
| **Communication and Autonomy** |  |  |  |  |  |  |  |  |  |  |
| Introductions by provider | 0.41 |  |  | 0.82 |  | 0.32 | 0.90 |  | 0.37 | 0.86 |
| Called preferred name |  | 0.45 |  | 0.82 |  | 0.35 | 0.88 |  | 0.27 | 0.93 |
| Heard and listened to |  | 0.52 |  | 0.55 |  | 0.65 | 0.58 |  | 0.54 | 0.71 |
| Consent | 0.55 |  |  | 0.66 |  | 0.54 | 0.71 |  | 0.55 | 0.70 |
| Involved in decisions | 0.54 |  |  | 0.52 |  | 0.67 | 0.55 |  | 0.69 | 0.53 |
| Explain exams/procedures | 0.76 |  |  | 0.46 |  | 0.63 | 0.61 |  | 0.72 | 0.48 |
| Explain medications | 0.73 |  |  | 0.46 |  | 0.66 | 0.57 |  | 0.74 | 0.46 |
| Told examination results | 0.70 |  |  | 0.55 |  | 0.54 | 0.71 |  | 0.65 | 0.58 |
| Told test results | 0.76 |  |  | 0.51 |  | 0.57 | 0.68 |  | 0.68 | 0.54 |
| Could ask any questions | 0.42 |  |  | 0.56 |  | 0.66 | 0.56 |  | 0.66 | 0.57 |
| Encouraged questions | 0.68 |  |  | 0.46 |  | 0.68 | 0.53 |  | 0.75 | 0.44 |
| Questions were answered | 0.45 |  |  | 0.55 |  | 0.67 | 0.56 |  | 0.68 | 0.54 |
| Check understood information | 0.64 |  |  | 0.46 |  | 0.70 | 0.51 |  | 0.74 | 0.46 |
| language they understood |  | 0.48 |  | 0.78 |  | 0.28 | 0.92 |  | 0.17 | 0.97 |
| Asked about birth plan | 0.43 |  |  | 0.76 |  | 0.40 | 0.84 |  | 0.42 | 0.82 |
| **Responsive and Supportive care** |  |  |  |  |  |  |  |  |  |  |
| Wait time for provider |  |  | 0.62 | 0.62 |  | 0.07 | 1.00 |  | 0.03 | 1.00 |
| Wait time for labs or drugs |  |  | 0.67 | 0.55 |  | -0.09 | 0.99 |  | -0.13 | 0.98 |
| Received best care |  | 0.72 |  | 0.43 |  | 0.69 | 0.53 |  | 0.71 | 0.49 |
| Physical wellbeing assessed | 0.44 |  |  | 0.75 |  | 0.47 | 0.78 |  | 0.42 | 0.82 |
| Mental/emotions wellbeing assessed | 0.68 |  |  | 0.56 |  | 0.58 | 0.67 |  | 0.56 | 0.69 |
| Resources for emotional/mental wellbeing | 0.59 |  |  | 0.67 |  | 0.50 | 0.75 |  | 0.51 | 0.73 |
| Attention when needed help |  | 0.49 |  | 0.54 |  | 0.65 | 0.57 |  | 0.67 | 0.55 |
| Trust |  | 0.73 |  | 0.47 |  | 0.64 | 0.59 |  | 0.71 | 0.49 |
| Competence |  | 0.59 |  | 0.64 |  | 0.49 | 0.76 |  | 0.58 | 0.66 |
| Washrooms |  | 0.37 |  | 0.87 |  | 0.28 | 0.92 |  | 0.36 | 0.87 |
| Cleanliness |  | 0.44 |  | 0.79 |  | 0.41 | 0.83 |  | 0.48 | 0.77 |
| Safe |  | 0.76 |  | 0.54 |  | 0.52 | 0.73 |  | 0.65 | 0.58 |
| Enough staff |  | 0.31 |  | 0.86 |  | 0.36 | 0.87 |  | 0.40 | 0.84 |

| **Appendix 6: Goodness-of-Fit Indicators of a Three- Factor Confirmatory Model for Combined CPIPE Baseline Sample** | | | | | | |
| --- | --- | --- | --- | --- | --- | --- |
| **Good-of Fit Statistic** | **Different models considering the levels of modification indices included** | | | | | |
| **36-items** | | | **20-items** | | |
| **Model 1** | **Model 2** | **Model 3** | **Model 4** | **Model 5** | **Model 6** |
| Chi-square, p-value | 11822.102, p<0.001 | 3523.978, p<0.001 | 2150.827, p<0.001 | 4917.535, p<0.001 | 1524.876, p<0.001 | 694.801, p<0.001 |
| Root mean squared error of approximation | 0.098 | 0.055 | 0.048 | 0.118 | 0.070 | 0.054 |
| Pclose | <0.001 | <0.001 | 0.922 | <0.001 | <0.001 | 0.050 |
| Comparative fit index | 0.627 | 0.900 | 0.941 | 0.700 | 0.913 | 0.963 |
| Tucker–Lewis index | 0.604 | 0.876 | 0.903 | 0.665 | 0.883 | 0.931 |
| Standardized root mean squared residual | 0.220 | 0.057 | 0.046 | 0.242 | 0.062 | 0.041 |
| **Model 1 -** Model with 36 observed variables without modification indices  **Model 2-** Model with 36 observed variables with modification indices whose covariates is 30 or more  **Model 3 -** Model with 36 observed variables with modification indices whose covariates is 10 or more  **Model 4 -** Model with 20 observed variables without modification indices  **Model 5-** Model with 20 observed variables with modification indices whose covariates is 30 or more  **Model 6 -** Model with 20 observed variables with modification indices whose covariates is 10 or more  **Note –** Model with 36 observed variables with modification indices whose covariates is 5 or more failed to run with an error of too many options, however Good of fit statistics suggest that an excellent model is the one with the modification indices, as observed increasing or lowering the covariance cutoff for inclusion improves model fit | | | | | | |

| **Appendix 7: Unstandardized and Standardized Loadings for Three-Factor Confirmatory Model of the PCANC scale using 36-observed variables** | | | | |
| --- | --- | --- | --- | --- |
| **Latent variable / observed variable** | **Ghana (N=992)** | | **Kenya (N=996)** | |
| **Unstandardized**  **(Standard error)** | **Standardized**  **(Standard error)** | **Unstandardized**  **(Standard error)** | **Standardized**  **(Standard error)** |
| **Dignity and respect** |  |  |  |  |
| Greeted | 1 | 0.67 (0.02) | 1 | 0.57 (0.03) |
| Treat you with respect | 0.81 (0.04) | 0.75 (0.02) | 0.75 (0.05) | 0.63 (0.03) |
| Friendly care | 0.82 (0.04) | 0.74 (0.02) | 0.84 (0.06) | 0.66 (0.03) |
| Knowledge valued | 1.14 (0.06) | 0.79 (0.02) | 1.02 (0.07) | 0.68 (0.03) |
| Privacy not exposed | 0.73 (0.05) | 0.54 (0.03) | 1.04 (0.09) | 0.51 (0.03) |
| Info confidentiality | 0.67 (0.05) | 0.51 (0.03) | 0.53 (0.05) | 0.43 (0.03) |
| Auditory privacy | 0.68 (0.06) | 0.39 (0.03) | 1.08 (0.08) | 0.52 (0.03) |
| Verbal abuse | 0.21 (0.03) | 0.28 (0.03) | 0.11 (0.02) | 0.17 (0.03) |
| **Communication and autonomy** |  |  |  |  |
| Introductions by provider | 1 | 0.28 (0.03) | 1 | 0.35 (0.03) |
| Called preferred name | 1.36 (0.19) | 0.40 (0.03) | 1.05 (0.14) | 0.35 (0.03) |
| Heard and listened to | 2.12 (0.25) | 0.67 (0.02) | 1.55 (0.16) | 0.62 (0.03) |
| Consent | 1.16 (0.25) | 0.55 (0.02) | 2.07 (0.21) | 0.55 (0.03) |
| Involved in decisions | 2.42 (0.28) | 0.79 (0.01) | 1.86 (0.20) | 0.56 (0.03) |
| Explain exams/procedures | 2.33 (0.28) | 0.72 (0.02) | 2.29 (0.24) | 0.63 (0.03) |
| Explain medications | 2.40 (0.28) | 0.75 (0.02) | 2.13 (0.22) | 0.63 (0.02) |
| Told examination results | 1.99 (0.24) | 0.60 (0.02) | 1.87 (0.21) | 0.50 (0.03) |
| Told test results | 2.12 (0.25) | 0.64 (0.02) | 1.86 (0.21) | 0.51 (0.03) |
| Could ask any questions | 2.06 (0.25) | 0.66 (0.02) | 2.25 (0.23) | 0.71 (0.02) |
| Encouraged questions | 2.56 (0.30) | 0.74 (0.02) | 2.50 (0.25) | 0.68 (0.02) |
| Questions were answered | 2.16 (0.26) | 0.68 (0.02) | 1.78 (0.19) | 0.68 (0.02) |
| Check understood information | 2.65 (0.31) | 0.82 (0.01) | 2.20 (0.23) | 0.62 (0.02) |
| language they understood | 0.83 (0.11) | 0.43 (0.03) | 0.09 (0.04) | 0.08 (0.04) |
| Asked about birth plan | 1.56 (0.19) | 0.40 (0.03) | 1.47 (0.18) | 0.41 (0.03) |
| **Responsive and supportive care** |  |  |  |  |
| Received best care | 1 | 0.84 (0.01) | 1 | 0.69 (0.02) |
| Wait time for provider | -0.07 (0.04) | -0.05 (0.03) | 0.33 (0.06) | 0.21 (0.03) |
| Wait time for labs or drugs | -0.38 (0.06) | -0.21 (0.03) | 0.22 (0.06) | 0.12 (0.03) |
| Physical wellbeing assessed | 0.70 (0.05) | 0.49 (0.03) | 0.94 (0.08) | 0.41 (0.03) |
| Mental/emotions wellbeing assessed | 1.19 (0.07) | 0.56 (0.03) | 1.15 (0.10) | 0.48 (0.03) |
| Resources for emotional/mental wellbeing | 1.14 (0.07) | 054 (0.03) | 0.75 (0.09) | 0.33 (0.04) |
| Attention when needed help | 0.98 (0.04) | 0.77 (0.02) | 0.95 (0.06) | 0.60 (0.03) |
| Trust | 1.06 (0.04) | 0.81 (0.01) | 0.97 (0.05) | 0.63 (0.02) |
| Competence | 0.80 (0.03) | 0.67 (0.02) | 0.66 (0.05) | 0.50 (0.03) |
| Washrooms | 0.82 (0.06) | 0.46 (0.03) | 0.31 (0.07) | 0.16 (0.04) |
| Cleanliness | 0.76 (0.05) | 0.49 (0.03) | 0.81 (0.08) | 0.40 (0.03) |
| Safe | 0.89 (0.04) | 0.65 (0.02) | 0.85 (0.05) | 0.64 (0.02) |
| Enough staff | 0.50 (0.05) | 0.33 (0.03) | 0.95 (0.08) | 0.44 (0.03) |
